# Supplementary material for: Survival Improvements in Advanced Hepatocellular Carcinoma with Sequential Therapy by Era
Source: MDPI journal article supplement (doi:10.3390/cancers15215298), 2023-11-06
Supplement: s1 [file s1]

**Table S1.** Characteristics of BCLC-B patients

| Variables                               |                | All                    | period 1<br>(2009-2013) | period 2<br>(2014-2018) | period 3<br>(2019-2022) | p-value                   |
|-----------------------------------------|----------------|------------------------|-------------------------|-------------------------|-------------------------|---------------------------|
| Number                                  |                | 125                    | 26                      | 55                      | 44                      |                           |
| Age (years)                             | Median (range) | 72 (48 to 89)          | 68 (48 to 82)           | 74 (53 to 82)           | 71 (50 to 89)           | 0.0505, 0.6090,<br>0.5077 |
| Sex, <i>n</i> (%)                       | Female         | 20                     | 3 (11.5)                | 6 (10.9)                | 11 (25.0)               | 0.184                     |
|                                         | Male           | 105                    | 23 (88.5)               | 49 (89.1)               | 33 (75.0)               |                           |
| ECOG PS, <i>n</i> (%)                   | 0              | 107                    | 24 (92.3)               | 46 (83.6)               | 37 (84.1)               | 0.607                     |
|                                         | 1              | 18                     | 2 (7.7)                 | 9 (16.4)                | 7 (14.9)                |                           |
|                                         | 2              | 0                      | 0                       | 0 (0)                   | 0                       |                           |
| Body mass index (kg/m <sup>2</sup> )    | Median (range) | 23.3 (11.2 to 33.0)    | 22.2 (15.7 to 32.7)     | 22.9 (17.3 to 32.7)     | 24.2 (11.2 to 29.6)     | 0.9954, 0.4990,<br>0.2329 |
| Etiology, <i>n</i> (%)                  | Viral          | 90                     | 23(88.5)                | 42 (76.4)               | 25(56.8)                | 0.012                     |
|                                         | Non-Viral      | 35                     | 3 (11.5)                | 13 (23.6)               | 19 (43.2)               |                           |
| Child-Pugh class, <i>n</i> (%)          | A              | 118                    | 26 (100)                | 51 (92.7)               | 41 (93.2)               | 0.473                     |
|                                         | B              | 7                      | 0 (0)                   | 4 (7.3)                 | 3 (6.8)                 |                           |
| ALBI score                              | median (range) | -2.56 (-3.61 to -1.34) | -2.54 (-3.01 to -1.66)  | -2.56 (-3.61 to -1.34)  | -2.59 (-3.35 to -1.51)  | 0.7852, 0.5943,<br>0.9741 |
| ALBI grade, <i>n</i> (%)                | 1 or 2a        | 91                     | 22 (84.6)               | 37 (67.3)               | 32 (72.7)               | 0.282                     |
|                                         | 2b or 3        | 34                     | 4 (15.4)                | 18 (32.7)               | 12 (27.2)               |                           |
| Maximum intrahepatic tumor size, cm     | median (range) | 2.5 (1 to 25)          | 2.9 (1 to 13)           | 2.1 (1 to 6.6)          | 2.8 (1 to 25)           | 0.2557, 0.9910,<br>0.3074 |
| Intrahepatic tumor number, <i>n</i> (%) | ≤ 4            | 26                     | 3 (11.5)                | 9 (16.4)                | 14 (31.8)               | 0.081                     |
|                                         | ≥ 5            | 99                     | 23 (88.5)               | 46 (83.6)               | 30 (68.2)               |                           |

|                                      |                |                  |                   |                   |                  |                           |
|--------------------------------------|----------------|------------------|-------------------|-------------------|------------------|---------------------------|
| AFP (ng/mL)                          | median (range) | 29 (0.9 to 5139) | 29 (3.5 to 53139) | 56 (1.9 to 39184) | 15 (0.9 to 2627) | 0.8709, 0.5406,<br>0.1675 |
| AFP ≥ 400 ng/mL, <i>n</i> (%)        | Absent         | 96 (76.8)        | 21 (80.7)         | 39 (70.9)         | 36 (81.8)        | 0.406                     |
|                                      | Present        | 29 (23.2)        | 5 (19.2)          | 16 (29.1)         | 8 (18.2)         |                           |
| The number of systemic therapy lines | 1              | 90               | 25 (96.2)         | 39 (70.9)         | 26 (59.1)        | 0.0407                    |
|                                      | 2              | 20               | 1 (3.8)           | 10 (18.2)         | 9 (20.5)         |                           |
|                                      | 3              | 7                | 0                 | 4 (7.3)           | 3 (6.8)          |                           |
|                                      | ≥ 4            | 8                | 0                 | 2 (3.6)           | 6 (13.6)         |                           |

P-values for continuous variables are indicated between period 1 vs. period 2, period 1 vs. period 3, period 2 vs. period 3, respectively.

Abbreviations: ECOG PS, Eastern Cooperative Oncology Group Performance Status; ALBI, albumin-bilirubin; BCLC, Barcelona Clinic Liver Cancer stage; AFP, alpha-fetoprotein.

**TABLE S2.** Characteristics of BCLC-C patients

| Variables             |                | All           | period 1<br>(2009-2013) | period 2<br>(2014-2018) | period 3<br>(2019-2022) | p-value                   |
|-----------------------|----------------|---------------|-------------------------|-------------------------|-------------------------|---------------------------|
| Number                |                | 211           | 60                      | 77                      | 74                      |                           |
| Age (years)           | Median (range) | 70 (19 to 89) | 67 (36 to 84)           | 69 (19 to 89)           | 72 (46 to 87)           | 0.0950, 0.2562,<br>0.8685 |
| Sex, <i>n</i> (%)     | Female         | 34            | 6 (10.0)                | 16 (20.8)               | 12 (16.2)               | 0.241                     |
|                       | Male           | 177           | 54 (90.0)               | 61 (79.2)               | 62 (83.8)               |                           |
| ECOG PS, <i>n</i> (%) | 0              | 172 (81.5)    | 50 (83.3)               | 62 (80.5)               | 60 (81.1)               | 0.891                     |
|                       | 1              | 31 (14.7)     | 8 (13.3)                | 13 (16.9)               | 10 (13.5)               |                           |

|                                         |                |                        |                        |                        |                        |                           |
|-----------------------------------------|----------------|------------------------|------------------------|------------------------|------------------------|---------------------------|
|                                         | 2              | 8 (3.8)                | 2 (3.3)                | 2 (2.6)                | 4 (5.4)                |                           |
| Body mass index (kg/m <sup>2</sup> )    | Median (range) | 23.1 (15.8 to 31.8)    | 22.2 (16.4 to 30.2)    | 23.0 (15.8 to 30.9)    | 23.9 (17.6 to 31.8)    | 0.4090, 0.0179,<br>0.1957 |
| Etiology, <i>n</i> (%)                  | Viral          | 147                    | 49(81.7)               | 51 (66.2)              | 47(63.5)               | 0.047                     |
|                                         | Non-Viral      | 64                     | 11 (18.3)              | 26 (33.8)              | 27 (36.5)              |                           |
| Child-Pugh class, <i>n</i> (%)          | A              | 194                    | 59 (98.3)              | 70 (90.9)              | 65 (87.8)              | 0.054                     |
|                                         | B              | 17                     | 01(1.7)                | 7 (9.1)                | 9 (12.2)               |                           |
| ALBI score                              | median (range) | -2.53 (-3.58 to -0.91) | -2.39 (-3.28 to -1.24) | -2.55 (-3.58 to -1.25) | -2.59 (-3.35 to -1.96) | 0.4240, 0.2008,<br>0.8489 |
| ALBI grade, <i>n</i> (%)                | 1 or 2a        | 143                    | 39 (65.)               | 52 (67.5)              | 52 (70.3.)             | 0.822                     |
|                                         | 2b or 3        | 68                     | 21 (35.0)              | 25 (32.5)              | 22 (29.7)              |                           |
| Maximum intrahepatic tumor size, cm     | median (range) | 3.0 (0 to 23)          | 2.6 (0 to 16.6)        | 2.8 (0 to 13)          | 4.1 (0 to 23)          | 0.9924, 0.2996,<br>0.0970 |
| Intrahepatic tumor number, <i>n</i> (%) | ≤ 4            | 130                    | 33 (55.0)              | 45(58.4)               | 52 (70.3)              | 0.148                     |
|                                         | ≥ 5            | 81                     | 27 (45.0)              | 32 (41.6)              | 22 (29.7)              |                           |
| Macrovascular invasion, <i>n</i> (%)    | Absent         | 129 (61.1)             | 35 (58.3)              | 50 (64.9)              | 44 (59.5)              | 0.685                     |
|                                         | Present        | 82 (38.9)              | 25 (41.7)              | 27 (35.1)              | 30 (40.5)              |                           |
| Extrahepatic metastasis, <i>n</i> (%)   | Absent         | 54 (25.6)              | 14 (23.3)              | 14 (18.2)              | 26 (35.1)              | 0.051                     |
|                                         | Present        | 157 (74.4)             | 46 (76.7)              | 63 (81.8)              | 48 (64.9)              |                           |
| AFP (ng/mL)                             | median (range) | 102 (0.9 to 1057992)   | 108 (2 to 1057992)     | 32.5 (1.3 to 189050)   | 205.75 (0.9 to 129880) | 0.8245, 0.9993,<br>0.7411 |
| AFP ≥ 400 ng/mL, <i>n</i> (%)           | Absent         | 128 (60.7)             | 36 (60)                | 52 (67.5)              | 40 (54.0)              | 0.239                     |
|                                         | Present        | 83 (39.3)              | 24 (40)                | 25 (32.5)              | 34 (46.0)              |                           |
| The number of systemic therapy lines    | 1              | 158 (74.9)             | 59 (98.3)              | 53 (68.8)              | 46 (62.1)              | < 0.001                   |

|     |           |         |           |           |
|-----|-----------|---------|-----------|-----------|
| 2   | 30 (14.2) | 0       | 13 (16.9) | 17 (23.0) |
| 3   | 17 (8.1)  | 1 (1.7) | 9 (11.7)  | 7 (9.5)   |
| ≥ 4 | 6 (2.8)   | 0       | 2 (2.6)   | 4 (5.4)   |

P-values for continuous variables are indicated between period 1 vs. period 2, period 1 vs. period 3, period 2 vs. period 3, respectively.

Abbreviations: ECOG PS, Eastern Cooperative Oncology Group Performance Status; ALBI, albumin-bilirubin; BCLC, Barcelona Clinic Liver

Cancer stage; AFP, alpha-fetoprotein.
